# Supplementary material for: Novel, Broadly Reactive Anticapsular Antibodies against Carbapenem-Resistant Klebsiella pneumoniae Protect from Infection
Source: PubMed Central journal article supplement (PMC5885035; doi:10.1128/mbio.00091-18), 2018-04-03
Supplement: mbo002183829sf1.pdf [file mbo002183829sf1.pdf]

A

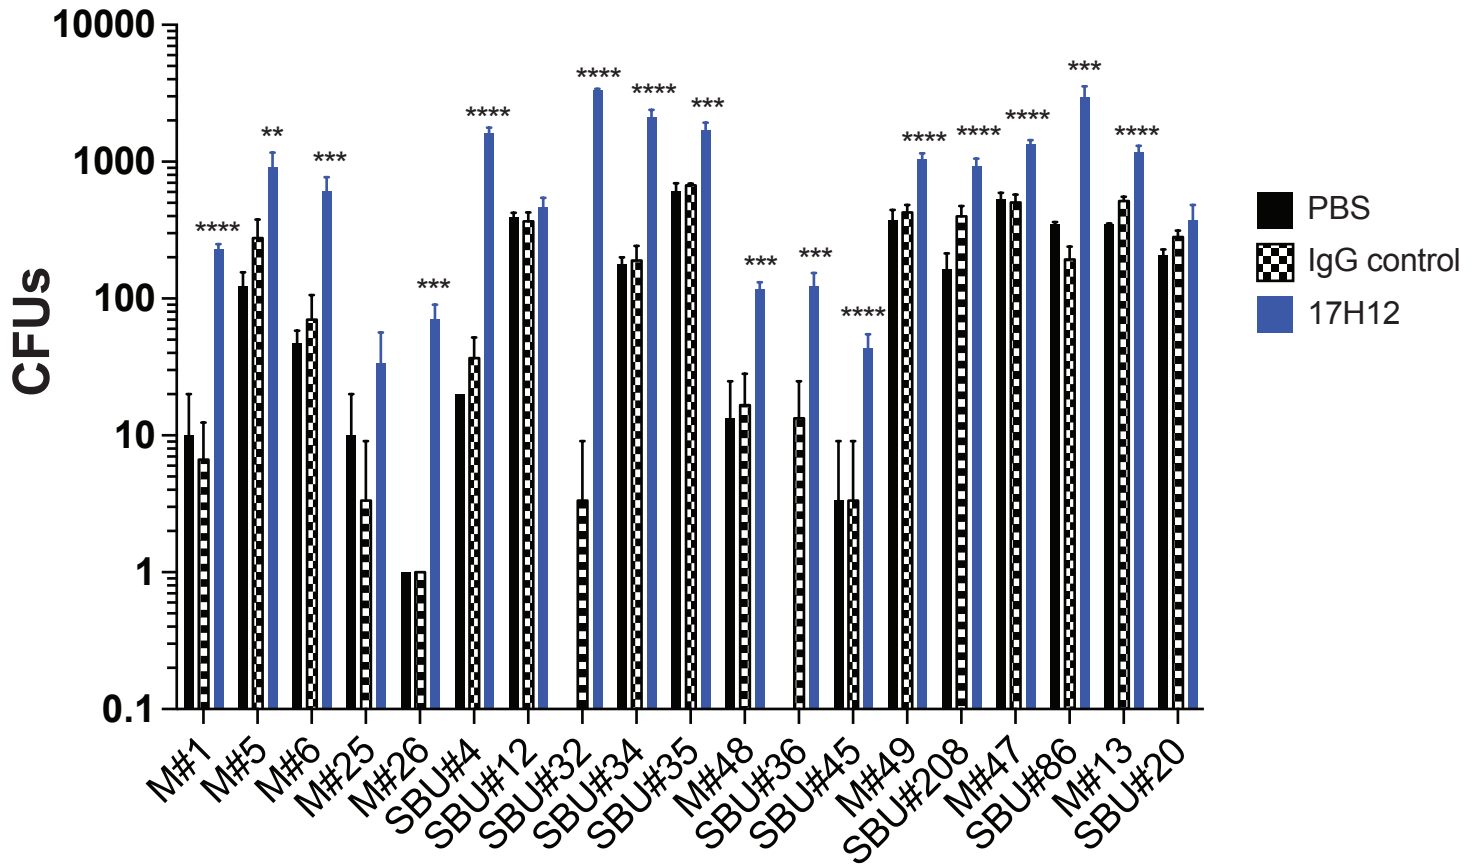

Supplementary Figure 1: J744.16 phagocytosis of CR-Kp clade 2 strains is enhanced by the incubation with 17H12. P-values were determined by one-way ANOVA and are depicted all together for visualization purposes. \*\* denotes p-value <0.01, \*\*\* denotes p-value <0.001 and \*\*\*\* denotes p-value <0.0001.
